# Supplementary material
Source: PubMed Central journal article supplement (PMC3591461)

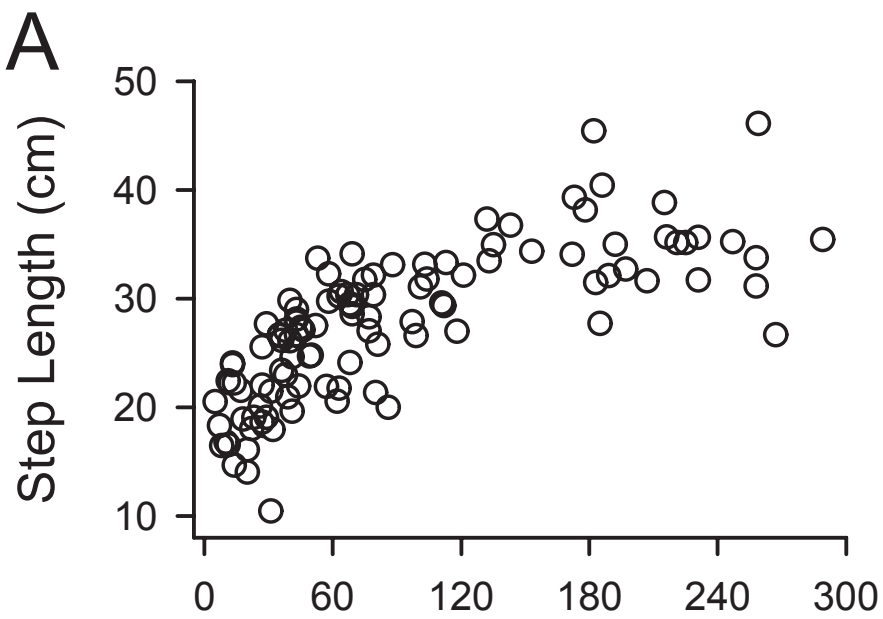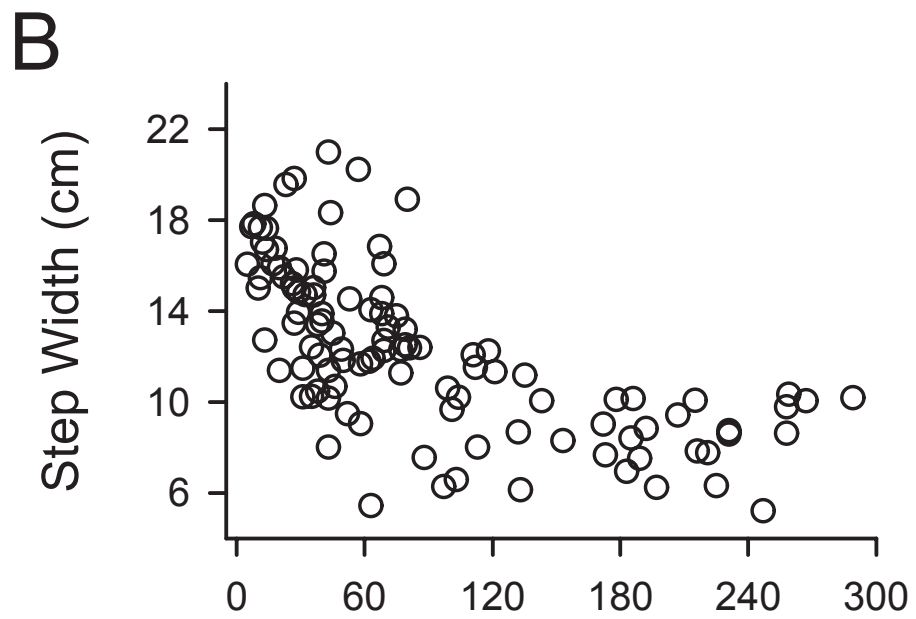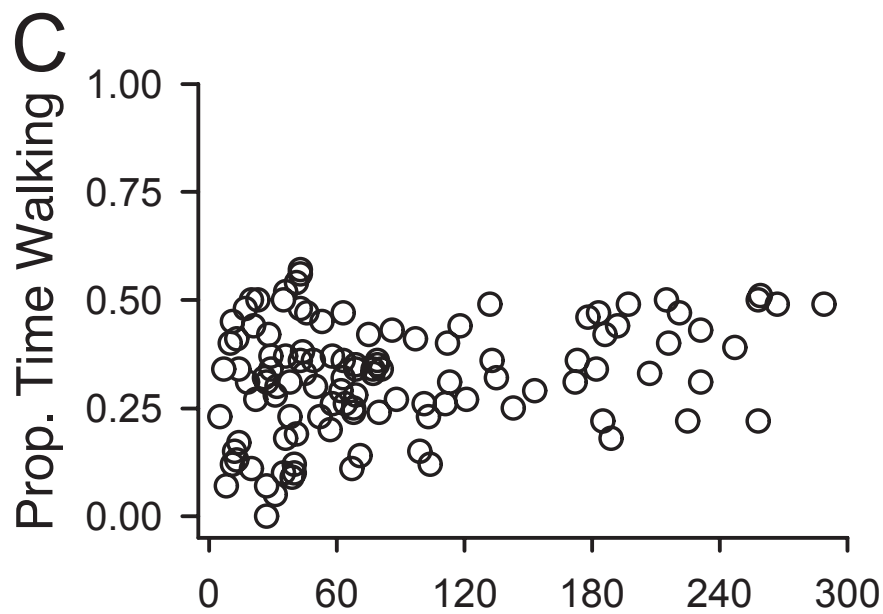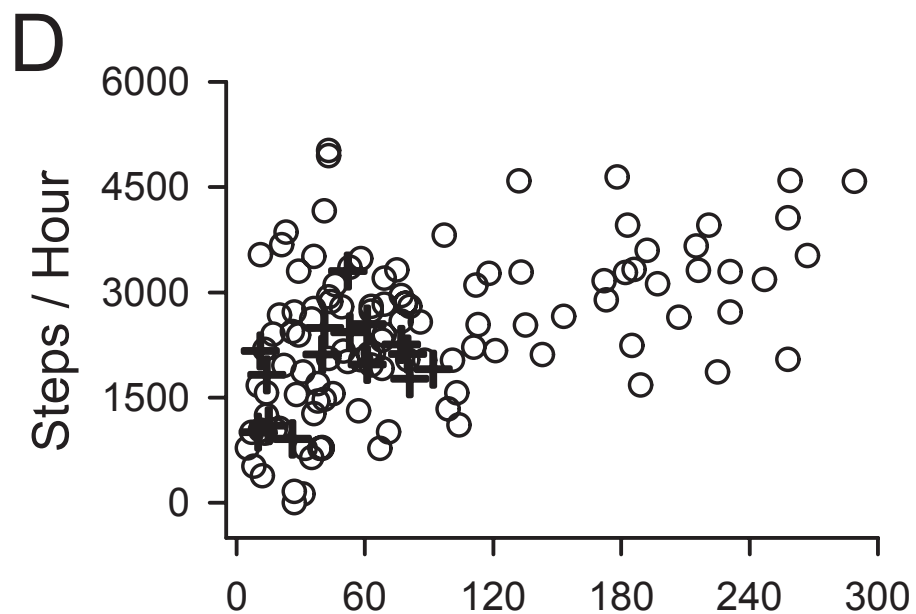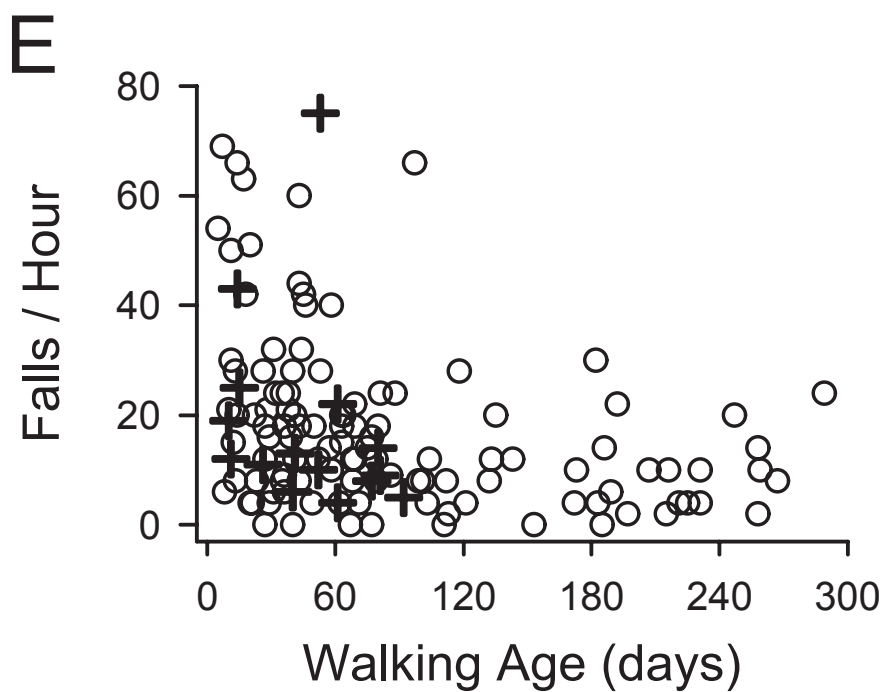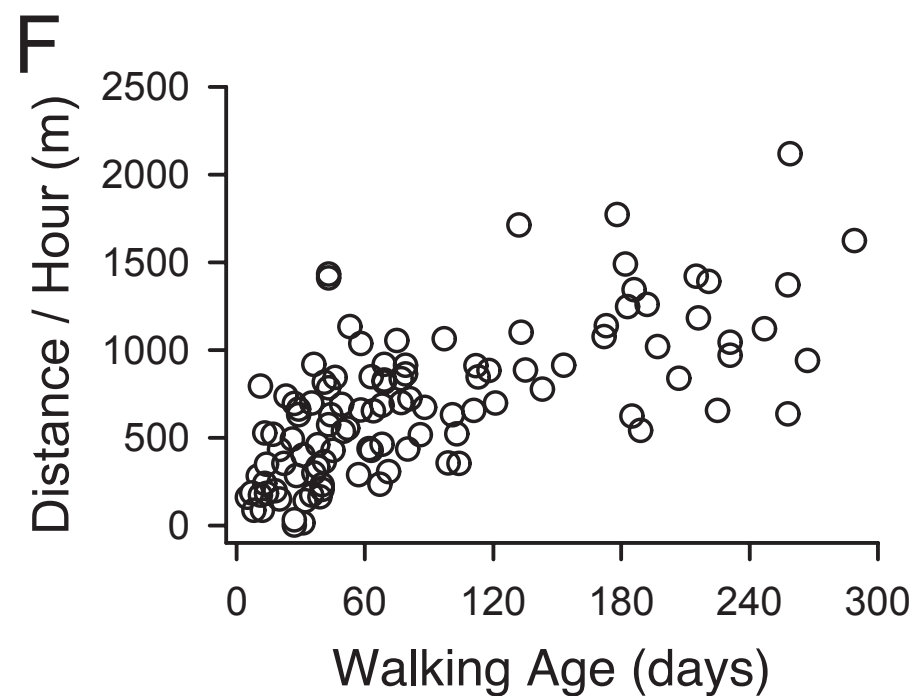

Supplement: NIHMS443642-supplement-Supplementary_Figure_1.pdf [file NIHMS443642-supplement-Supplementary_Figure_1.pdf]

# Infants

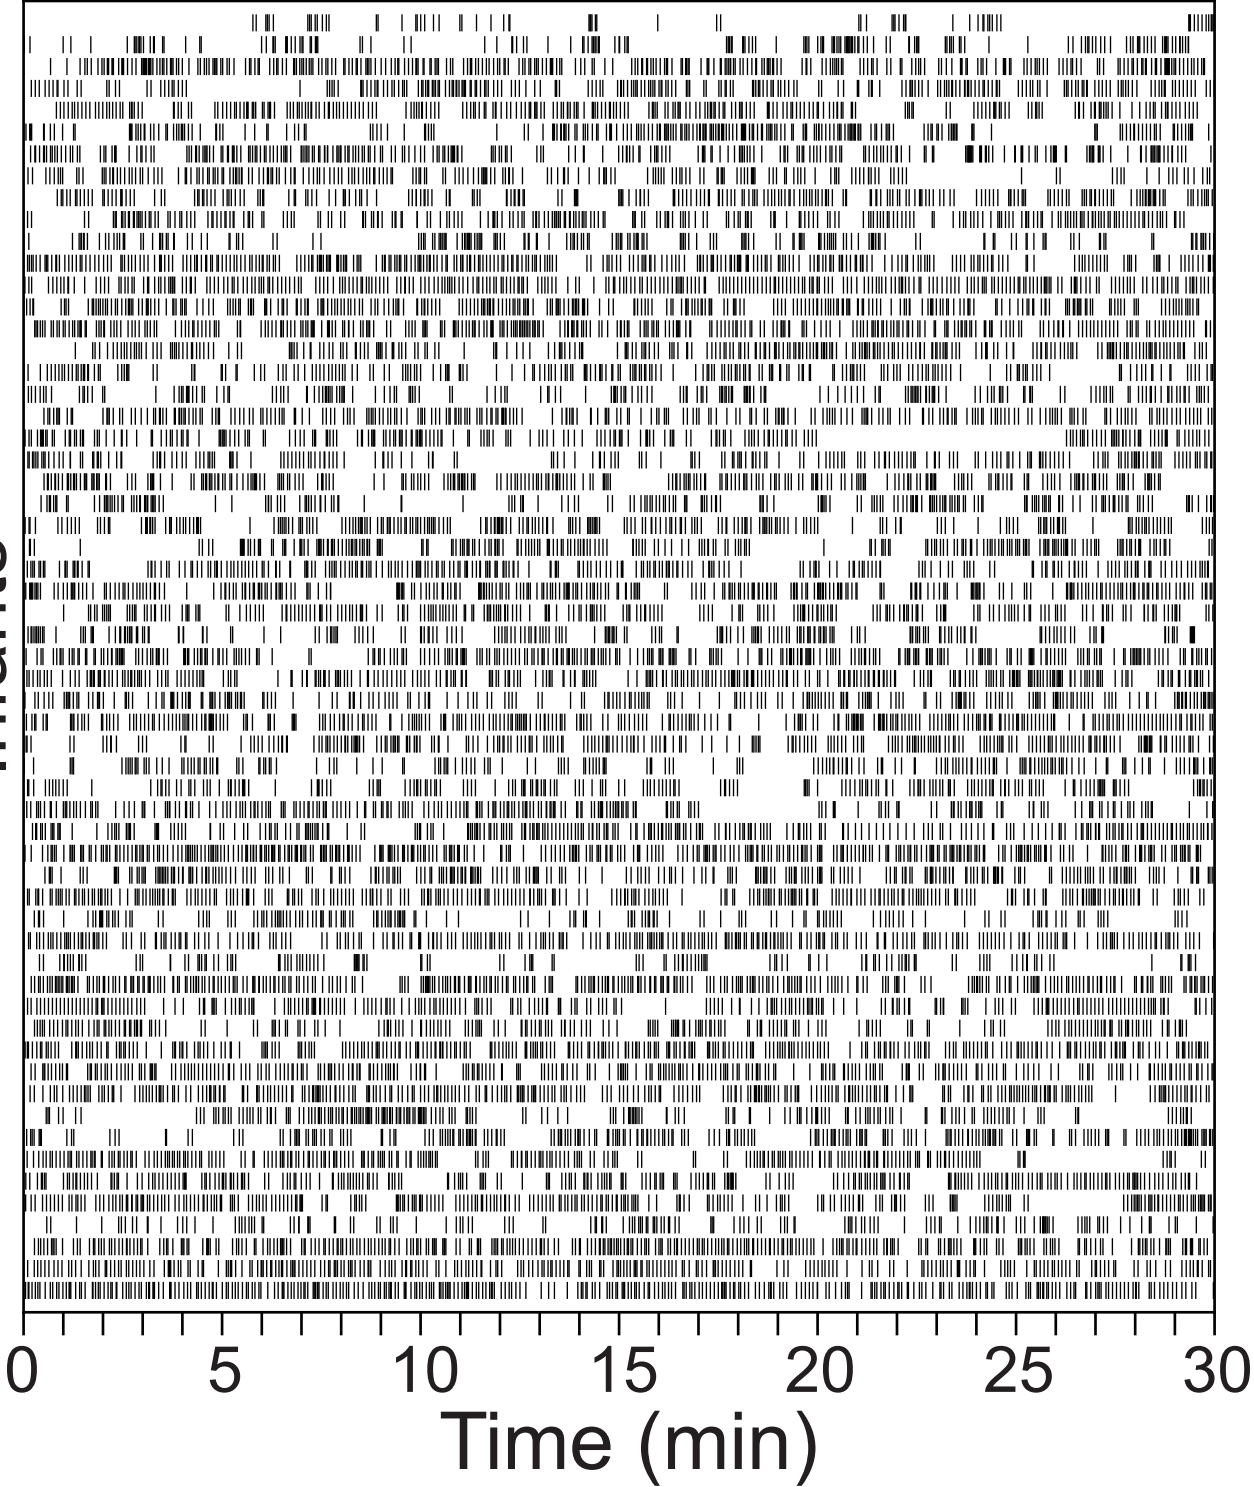

0 5 10 15 20 25 30

Time (min)

Supplement: NIHMS443642-supplement-Supplementary_Figure_2.pdf [file NIHMS443642-supplement-Supplementary_Figure_2.pdf]
